# Supplementary material for: Immunoglobulin somatic hypermutation has clinical impact in DLBCL and potential implications for immune checkpoint blockade and neoantigen-based immunotherapies
Source: J Immunother Cancer. 2019 Oct 22;7:272. doi: 10.1186/s40425-019-0730-x (PMC6806565; doi:10.1186/s40425-019-0730-x)
Supplement: Supplementary file 3 — Additional file 3. Diagnostic immunoglobulin heavy chain gene sequences [file 40425_2019_730_MOESM3_ESM.xlsx]

## Sheet: Heavy chain
KHY-code	Diagnostic heavy chain sequence
1	TCGATTCAGTCTCTCCAGAGACAACGCCAGGAATTCAATGGATTTACAGATGAGGAGCCTGAGAGTCGACGACACGGCAACTTACTTCTGTGCGAGACATTTCTTATATTTTGATTATTGGGGCCAGGGG
11	ACTCACCGTCTCCAAGGACACCTCCAGAAACCAGGTGGTCCTTACAATGACCAACATGGACCCTGTGGACACAGCCACTTATTACTGTGCACGGTCCCGTTCGGGGAGTTATGACTACTGGGGCCAGGGA
13	GTCTAAGAGTCAGTTCTCCCTGAAGTTGACCTCTTTGACCGCCGCGGACACGGCTGTCTATTACTGTGCGAGATGCAACACTTCTAACGACGGTAACGACCCGAATTACTTTGACTATTGGGGCCATGGG
14	GAAGGGCCGCTTCACCATCTCCAGAGACACTTCGAAGAACACGCTGCATCTCCAAATGAGCAGCCTGATAATTGAGGACACGGCTGTCTATTACTGTGCGAGAAACCTTTCTGACTTCTGGGGCCAGGGA
15	CACAGCCTACTTGCAATTACGGAGCCTGAAATTTGACGACACGGCCGTATATTACTGTGCGAGAGACACTACACGGTTCTTGGAGTGGTTGTTATCAAAGCATTATGGTATGGACGTCTGGGGCCAAGGG
16	CACCATCTCAAGAGATGATTCAAAAAACACGTTGTATCTACAAATGAACAGCCTGAAAACCGAGGACACAGCCATTTATTATTGTACTAGTAATTCGACGGTGACTACGGGGGACTACTGGGGCCAGGGA
17	CAGGGACACATTCGCGAGTACAGCCTACATGGAGGTGAGCAGCCTGACATCTGAAGACACGGCTGTATATTACTGTGCGAACAGTACTAGTGGCTGGCAGTGGAACTACTTCGACCCCTGGGGCCAGGGA
20	ATTCACCGTCTCCAGAGACAATGCCAAGAATTCACTGTTTCTGCAAATACACACCCTGAGAGACGAGGACACGGCTATTTATTATTGTACGAGAGGGATTAGAGATGGTTACAATTATTGGGGCCAGGGG
22	AGACAATTCGAAGAACACGCTGCATCTTCAAATGAACACCCTGAGAGCCGAGGACACGGCTGTGTATTACTGCGCGCGGAGACAGTCGGGCGCCTATTACCACTACGGTATGGACGTCTGGGGCCAAGGG
28	ACTCACAATGACAATAGACACACCCACGCGCACAGTTTTCATGGAACTGATGAGCCTCAAATTTGACGACACGGCCATATATTTCTGTGCGCGAAATGACTCCGGCTGGCACGACTCTTGGGGCCAGGGA
32	CATTTCGAAAAATACAGTGTCTCTGCAAATGAATAGCCTGAGCGCCGAGGACACGGCCATTTATTATTGTGCGAAGACCCGAGGATATTGCAGTGGTGGTAGCTGTTACTTCGATTATTGGGGCCGGGGA
39	AACATCACAATCTCCCTTAAAATTATCTACTGGAAAGCTGAGGAGTAGGCAGTGTATTACTGTGAGAGATCGGGAGGGTATTGTAGTAGTACCAGCTGGGGGGTACTACTTTGACTACTGGGGCCAGGGA
46	GAGCGCCAACGCCACGAATTCATTTTATCTTCAAATGAATAGCCTGAGAGCCGAGGACACGGCCCTATACTATTGTGTGCGACACATGTCCCTCACGGCCGCCAGTGTCGGAATCTCTTGGGGCCAGGGA
47	GAATCAATTCTCCCTGAAGTTGAGCTCTGTGACCGCCGCGGACACGGCTCTATATTTTTGTGCGAGAGAAGGAATTGGATGTGGTGGTATTATATGCTCAAAGGACTATATGGACGTCTGGAGTAAAGGG
50	ACGAGACACGTCCAGGAACCAGTTTTCTCTGAAGGTGACCTCTATAAGTGCTGCGGACACGGCCGTTTATTTTTGTGCGAGAGGTCTTTCTTCTGATAATCGTGACTACTTCACGCCCTGGGGTCGGGGA
51	AGTCGTCATTACCAGGGACACATCCGCGAGCACAGTTTACATGGAGCTGAACAGCCTCACATCTGAAGACACGGCTATGTATTATTGTGCGAGAAATAACAGTGGCCCCTTTGACTACTGGGGCCAGGGA
52	CACCATATCAATAGACAGGTCCAACAACCAGTTCTCCCTGAAGCTGACCTCTGTGACCGCTGCAGACACGGCCGTGTATTACTGTGCGAGAGACGCCATGGCGAATAATATGGACGTCTGGGGCCAAGGG
53	CATCTCCAGAGACAACACCGGCAAGACATTGAGTCTGCAAATGAACAGTCTCAGAGGAGAGGACACGGCTGTCTATTACTGTGCGAGATCGGCGATATTTTGGGACGGCGTGGACGTCTGGGGCCAAGGG
58	AGTCACCATATCAGTAGACATGTCCAAGAACCAGTTCTCCCTGAAGATGAGCTCTGTGACCGCCGCGGACACGGCTATGTATTACTGTGCGAGAGGACCAACGAGAAACTTTGACTACTGGGGCCAGGGA
61	TTCCAAGAACACCCTACATCTGCAAATGAACAGCCTGAGAGCCGAGGACACGGCCGCATATTATTGTGCGAAAAATGACATGGCTACAATTACTCGCTACTACTACGCTATGGACGTCTGGGGCCCAGGG
63	TTCACTATACCTGCAAATGAATAGCCTGAGAGCCGAAGACACGGCTGTCTATTATTGTGCGAGAAATCATTCTCAACACGCACAGGAGATCTCGGAGTACTTTTCTGGTTTGGACGTCTGGGGCCAAGGG
65	GTCCAAGAATCAGTTCTCCCTGCAAGTGAGCTCTGTGACCGCCGCGGACACGGCTGTGTATTACTGTGCGAGAGGCCCCGCTGGGGATGCTGACTACTACTACTACGGTCTGGACGTCTGGGGCCAAGGG
66	CTACATGGAACTGAGCAGTTTGAAATCTGACGACACGGCCGTGTATTACTGTGCGAGAGGCCCCCAGGGGGTACTATGGTTCAGGGAGTTATTAAGGCATACCTACTACTTTGACTCCTGGGGCCAGGGA
67	CAGAGACAATTCCAAGAGCACGCTGTATCTGCAAATGAACAGCCTGAGAGCCGAGGACGCGGCCCTATATTACTGTGCGAAAGAGAGATCGGCTGGAAATACCGGTAGTAAAGACTACTGGGGCCAGGGA
68	CATATCAAGAGACACGGCTAACAACCAGTTCTCCCTGAAATTGAAATCTGTGACTGCCGCTGACACGGCCGTCTATTATTGTGCAAAAAAGGGGGACTACGGTGACTACTTTGACTCCTGGGGCCAGGGA
72	CTCCAGAGACAATTCCAAGAACACATTATATCTGCAAATGAACAGCCTGAGAGACGAGGACACGGCTGTGTTTTATTGTGCGAGAGGAAATTATGAAAGGAGTGGTTATCAGGACTACTGGGGCCAGGGA
74	CCGGTTCACTATTTCCAGAGACAACGGCAAGAGGTCACTTTATCTCCAACTGGACAACCTGAAAGACGAGGACACGGCTGTCTATTATTGCACGACGAATCAGGGAGGCCTAAAAGACTGGGGCCGGGGA
79	GTCCAAGAACCAGTTCTCCCTACAACTGACCTCTGTGACCGCCGCGGACACGGCTCTGTATTTCTGTGCGAGAGGTAGGAGATATAGCAGCAATAACTTCGTTGGCGCCTTTGATGTGTGGGGCCAAGGG
84	GGGCCGATTCACCATCTCCAGGGACAATTCAAAGAATACGGTGTCTCTTCAAATGAACAGCCTGAGAGTCGAGGACACGGCCGTCTATTATTGTGCGAGAAATGGGAGTATGGACGTCTGGGGCCAAGGG
88	GGGCCGATTCACCATCTCAAGAGACAATTTCAAGAATACTCTGTATCTTCAAATGAACAGCCTGAGAGTCGAAGACACGGCCGTGTATTACTGTGGGAGTCATTTCCCGGTCACTTATTGGGGCCAGGGA
90	CAGAGACAACGCCAAGAACTCACTGTATCTGCAAATGAACAGCCTGAGAGCCGAGGACACGGCTGTGTATTACTGTGCGAGAGATGGGGGGCCTGGGGGGGCAGCCCCTTTCGACCCCTGGGGCCAGGGA
103	GTCCTTAAAATGACCATTTTAGACCGTGTGCACACACCTACTGATTCCTATACACGGGTCGCCATTTCGTCGCCTGTTTAAATGCTTAGCCACCAATGACTCCTACAAAATAGACGTCTGGGGCCAAGGG
104	AACACTGTATCTGCAAATGAACAGTCTGAGAGCCGAGGACACGGCTCTGTATTACTGTGCAAGGGGGACGGTAGTGGGAGCTACTTGGGACCACTATTACTACTACGGTATGGACGTCTGGGGCCAAGGG
106	GTTCTCCCTGAATTTGAGGTCTATGACTGCCGCGGACACGGCTGTGTATTACTGTGCGCGAGGCCGGCACCCAGGAGGTTTGGAGTGGTTATTATTCGGTGGAGGGGGCTTTGACTACTGGGGCCAGGGA
108	CAGAGACAAGTCCATGAACACCTTGTATTTGCAAATGAACAGCCTGAGAGCTGAGGACACGGCAGTCTACTATTGTGCGAAAGCCTCTACTTTTGATGCGAGTTTTTACATTGACTATTGGGGCCAGGGT
110	CCAGTTTTCCCTGAAGTTGAGCTCTGTGACCGCCGCGGACACGGCTGTGTATTACTGTGCGAGAGCCGCTCATTATTATGATAGTAGTGGTTAGGACAAACGAGCGGCTTTTGATATCTGGGGCCAAGGG
116	CAATTCCAAGAACACACTGTATCTGCAAATGAACAGCCTGAGAGTCGAGGACACGGCCATGTATTACTGTGCGAAAGAGGCCCTTGAGGGCAGCAGCCCGCTGAACTGGTTCGACCCCTGGGGCCAGGGA
118	ATCAGTAGACACGTCCAAGAACCAATTCTCCCTGAAGCTGAGGTCTGTGACCGCCGCGGACACGGCTATGTATTACTGTGCCAGAGGATGGTTCGGGGACCTCAGGTACTTCGATCTCTGGGGCCGTGGC
119	CTCTGTGACCGCCGCGGACACGGCAGTATATTACTGTGCGAGAAGGGCCATGGTTCGGGAAGTTGTTATCAAGGAATTCTCCCCGAAACCCCCTTATTACTATTACGGTGTGGACGTCTGGGGCCAAGGG
120	TTCCAGGAACACAGTATATCTGCGAATGAACAGCCTGACAGTTGAGGACACGGCTGTGTATTACTGTGCGAGGCCCCCTAATGAGTATGATATGACATGGTACTGGTATTTCGATTTCTGGGGCCGCGGC
121	TACCGCGGACGAATCGACGAGCACAGCCTACATGGAACTGAGTAGTCTGAGATCTGACGACACGGCCGTGTATTATTGTGCGAGAGATCTAGGCCAGGGAGCGACATACTTTTACTATTGGGGCCAGGGA
122	GGGCCGATTCACCATTTCCAGAGACAACACCAAGAATTCTGTTTTTCTTCAAATGAATAGATTGGGGGTCGAAGACACGGCAGTCTATTATTGTGCGCGAAATACATCTTTTGACTTCTGGGGCCAGGGA
124	CATCATCTCCAGAGACAACGCCAACAGTTCTTTGTATCTTCAAATGAACAACCTGAGAGCCGAAGACACGGCTGTCTATTACTGTGCGAGAACTACGGTCGCTGCCGTCTTTGACTCCTGGGGCCAGGGA
125	ACTGTTTTTGCAAATGAACAGCCTGAGAGGCGACGACACGGCCGTGTATTACTGTGCGAGAGACCTCTTTCATAGGTCCTTAGACGACGGTGGTAATGGATATTGGTACTTCGATCTCTGGGGCCGTGGC
127	TACCGCGGACAAATCCACGACTACAGTCTACATGGAACTGAGCAGCCTGAGATCTGAGGACACGGCCATATACTATTGTGCGAGAGGGCCTGATAGTAGTTCTTATTACTATTTCTACTGGGGCCAGGGA
129	GGGCAGATTCACCATCTCCAGAGATGATTCAAAAAACACGGCATATCTACAAATGAACAATTTGAAACCCGAGGACACGGCCCTCTATTATTGTAGTGGTCAACTGGAATCAACCTACTGGGGCCAGGGA
133	AGACAACTCCAAAGACACGGTGAATTTACAAATGAACAGCCTGAGAGCCGAGGACACGGCCATTTATTACTGTGCGAAAGATGTGAGAACTGGAACTAGTAGTTCGTACTTTCACCACTGGGGCCAGGGA
136	CTCCAGAGACAACAGCCGAAAGTCCCTGTATCTGCAAATGAACAGTCTGAGAACTGACGACACCGCCTTCTACTATTGTGCAAAAGAATATAGAAGTGGCTGGTCGGAAATTGAGTCCTGGGGCCAGGGA
137	CTCCAGAGACAACGCCAAGAATTTAGTGTATCTGCAAATGAACAGCCTGAGATGCGAGGACACGGCTGTCTATTACTGTGCGATAAGGGCTCCCAGGTATTATTACGGTATGGACGTCTGGGGCCAAGGG
139	CAAGAACACTCTTTATCTGCAAATGAAAAGTCTGAGAGTCGAGGACACGGCTGTATATTATTGTGCAAGAGAACGGCATTTTAATATGCTTCACGGACATATTATTGCTTTTGATATTTGGGGCCAAGGG
142	GAAAAAATTTACTCTACCTACAAATGAGTGATCTGAGAGCGAAGACACAGGTTTCTACTATTGTGCGAGAGGCGATTATGCTGATGAGAGGGGTGACTTCGTTGATGATTTTGATGTTTGGGGCCAGGGG
144	CAGAGACAATTCCAATAACACGCTGTATGTGCAAATGAACAGTCTGAGAGCCGAGGACACGGCCATGTATTTTTGTGCGAAAAAATGGCGGGATACACATCTTTCCCCCATTGAAAACTGGGGCCAAGGA
145	CACCATCTCAAGAGATGATTCAAGAAACACACTGTTTCTGCAAATGAACAGCCTGAAAACCGAGGACACAGGCGTTTATTACTGTACCACAGAAACTCGGCAGAATAACTTTGACTACTGGGGCCAGGGA
146	AGTCACCATATCAGTAGACACGTCCAAGAACCAGTTCTCCCTGAAGCTGAGCTCTGTGACCGCCGCGGACACGGCTGTGTATTACTGTGCGAGACATGGGGGGTTGCCCTTTGACTACTGGGGCCAGGGA
149	ATTCACCATCTCCAGAGACAATGGCAAGAGTACTCTGTCTTTGGAAATGAAGAGTCTGAGAGCCGAGGACACGGCTGTATATTTTTGTGCTGGAAACGGCACAGATGGTCTGGACGTCTGGGGCCAAGGG
150	CATATCACTAGACACGTCCAAGAATCAGTTTTCCCTGAGCCTGACCTCTGTGACCGCCGCAGACACGGCCGTCTATTACTGTGCGAGAGCGGGGGGACATACTGGCCACGGGGGACAGTGGGGCCAGGGA
158	TAAGAACCAATTCTCCCTCAAGCTGAACTCTGTGACCGCCGCGGACACGGCTGTGTATTTCTGTGCGAGGAATAGTAGTGGCTGGCATAACTCCCATAATGTGTATTTCTTTGACTTCTGGGGCCAGGGA
160	CACCATCTCCAGAAGCAATGCCAAGAATTCATTGTATTTGGAAATGAACAGCCTGAGAGACGAGGACACGGGTGTCTATTATTGTGCGAGAGTTTTGGCAGTGGGTGCAAGTGACTACTGGGGCCAGGGA
161	CATGGAGCTGAGCAGGCTGAGATCTGACGACACGGCCGTGTATTACTGTGCGAGAGCCAAGAACTCAAAACGTATTACGATTTTTGGAGTGGTTACTCCCATCTACGGTATGGACGTCTGGGGCCAAGGG
164	CTCCAGAGACAATTCCAAGAACACACTGTATCTGCAAATGAACAACGTGAGAGCCGAGGACACGGGTGTATATTATTGTGCGAGAGGAAACAACTACTTCTATTACTACATGGACGTCTGGGGCAAAGGG
168	TGCGTTCGTGCATTGGCGCGGCCTGAGGGCCTCGGACACCGCCACGTACTATTGTGCGAGAAATATCTTTTATCACACTAATTCGCTCTTGGGTACGAGATATTATTACATGGACGTCTGGGGCAAAGGG
169	GCAGAATACGTTGTATCTTCAATTGAACAACCTGAGAGTCGAGGACACGGCCATGTATTATTGTGCGCGAGAGGGTCGCGATCGGTGTAGTGACATAAGCTGCTCGCACCTCCAAAACTGGGGCCAGGGC
170	CACCTCCAAAAACCACGTGGTCCTTACAATGACCGACATGTCCCCTGTGGACACAGCCACCTATTATTGTGCACGCCTTGACTTCGGTGACAACGTGGGACGGGGCTTTTTTGACTACTGGGGCCAGGGA
171	AGACAATTCCAAGAACACGCTGTATCTGAAAATGAACAGCCTGAGAGCCGAGGACACGGCTGTGTATTACTGTGCGAGAGATTCGATAGCAGTGGCTGGACTGAACTGCTTCGACCCCTGGGGCCAGGGA
176	TACAGACACAGCCTACATGGAGCTGAGCAGCCTGAGATCTGAGGACACGGCCGTGTATTACTGTACAACAGTTGGGGTTTCGGGGTTTTTACCCTACTACTACTACGGTATGGACGTCTGGGGCCAAGGG
177	CAAGAACCAGTTGTCCCTGCAGCTGAACTCTGTGACCGCCGCGGACACGGCTGTGTATTACTGTGCGAGAGGCGGGGTACGAGACCGGTGGAACTACTACTATTACGGTATGGACGTCTGGGGCCAAGGG
178	CAAGAAACAGTTCTCCCTGAGGTTGACCTCTGTGTCCGCCGCAGACACGGCCGTATATTACTGCGCGAGCCTAGGACGGGGTATACCAGTGGCTGGTTTTCGCAACTGGGTCGACCCCTGGGGCCAGGGA
179	CAGAGACAACGCCAAGAATTCACTGTTTCTGCAAATGAATAGCCTGAGAGACGAGGACACGGCTATATATTACTGTGCGAGAGATAAACGAGTAGTGGCCAACGGGGGGTTCGACCCCTGGGGCCAGGGA
180	CTCCAGAGACAACGCCAACAACTCACTGTATCTGCAAATGAATGACCTGAGAGCCGAGGACACGGCACTTTATTTCTGTGCGCGAGATGGTTCGGTTCATAGTGGGGCGTTTGACTACTGGGGCCAGGGA
182	TCGATTCAGTATCTCCAGAGACAACGCCAGGAATTCAATGGATTTACAGATGAGGAGCCTGAGAGTCGACGACACGGCAACTTACTTCTGTGCGAGACATTTCTTATATTTTGATTATTGGGGCCAGGGG
192	CACGTGCAGGAATCAGTTTTCTCTGAGACTGACGTCTGTGACCGCTGCGGACACGGCCATTTATTATTGTGCGAGAAGCGATTTTGCCTGGTTTCAACCCATCTCTAGTTTTAATTATTGGGGCCAGGGA
193	CCGATTCATCATCTCCAGAGACAATGCCACAAATTCACTGATTCTGCAAATGAACAGCCTGCGAGTCGAAGACACGGCTCTTTATTATTGTGCGACGGGAAAATTGTGCTTTGAGTCCTGGGGCCAGGGA
195	TTCCAAGAACACGGTGTATCTTCAAATGAACAGCCTGAGAGCCGAGGATATGGCTGTGTATTACTGTGCGAGAGATCAGCCGTGGGAGTTATTAGAGGAAGGTGATGCTTTTGATATCTGGGGCCAAGGG
202	GTTCTCCCTGAAGCTGAGCTCTGTGACCGCCGCAGACACGGCTGTGTATTACTGTGCGAGACATTCCAGTACAACAGTGGCTGGTACGCCTACCTACTACTACTACTACATGGACGTCTGGGGCAACGGG
204	CAATGCCAAGAACTCTCTGTTTCTGCAAATGAACAGTCTGAGAGCCGAAGACACGGCTGTATATTACTGTGTGACAAACCGCACTAATGTTAGGGGCCCACAGGGCGGATTCGACCCCTGGGGCCAGGGA
205	CCGATTCACCATCTCCAGAGACGAGGCCAAGAACGCAGTATATTTGCAAATGACCAGCCTGCGAGTCGAAGACACGGCCATGTATTATTGTGTCAGAGGATATGATATGTTTGACATCTGGGGCCAGGGA
209	CAAGAACCACTTCTCCCTGAGGCTGAGTTCTGTGACCGCTGCGGACACGGCCGTATATTATTGTGCGAGAGATTCATATTGTAGTGGTGGTAGTTGCTTTGACTGGTACTTCGATCTCTGGGGCCGTGGC
212	TTACAAGAACACGTTGTATCTGCAAATGAACAGCCTGAGAGTCGAGGACACGGCTGTGTATTACTGTGCGAGAGATGATAATATAGCAGAGACATATTACTATTATGGTGTGGACGTCTGGGGCCAAGGG
220	TTTGTATCTGCAAATGAACAGCCTGAGAGCAGGCGACACGGCTGTGTATTACTGTGCGAAAGATCGTTCATATGATTACGTTTGGGGGAGTTATCGCTATTCTCCCTGGTTCGACCCCTGGGGCCAGGGA
222	CAGAGACAATTCCAAGAACACGCTGAATCTGCAAATGAACAACCTGAGAGCCGGCGACACGGCCGTTTATTTTTGTGCTAAAGATCATGACCGATATAGTAGTCCACCGCATTCGCCCTGGGGCCAGGGA
223	CACAAACCAGTTCTCCCTCAAGTTGACCTCTGTGACCGCCGCGGACACGGCCATATATTACTGTGCGAGAGATAAACAGGTCGGCTTAGGCAGCAGCTCGTTTCGGTGGTTCGACCCCTGGGGCCAGGGA
228	CCAGAGACAATTCCAGGAACTTCCTGTATCAGCAAATGAACAGCCTGAGGCCCGAGGACATGGCTGTGTATTACTGTGTGACAATAGGCGAGGGTATAGCAGCAGCTGGTAGGGGTACTGGGGCCAGGGA
232	CTCCGTCTCCAGAGACAACGCCAAAAGTTCGTTCTATTTCCAAATGAGCAGTCTGAGAGTCGACGACACTGCTGTCTATTATTGTGCGAGAGTGAGGGGGAGTTATTCTTTTGACCTCTGGGGCCAAGGA
233	TTCCAAGAACACAGTGTATTTACAAATGAACAGCCTGAGTGTCGAAGACACGGCCGTTTATTACTGTTCGAGGGACCCCAAGAAAGGCGTTGTGTATGAATTGAACTACTTCGACCCCTGGGGCCAGGGA
235	TCGAGTCACCATGTCAGTAGACACGTCCAGGAAGCAATTCTCCCTGAAACTGAACTCTATAACCGCCGCGGACACGGCTGTCTATTATTGTGCGAAACTTGCGGGGGAATATGGTGCCTTGGGCCAGGGA
236	CGCCAAGAACTCACTGTATCTGCAAATGAACAGCCTGAGAGCCGAGGACACGGCTGTGTATTACTGTGCGAGAGAGCCCCATTACGATTTTTGGAGTGGCTTAGATTCTTTTGATATCTGGGGCCAAGGG
238	ATCCACGAACACAGCCTACATGGAGCTAAGGAGCCTGAAATCTGACGACACGGCCGTGTATTACTGTGCGAGGAACGCCCGCGGCGGGTTGGTTACGCCTACTTCCTGGCTCGACCCCTGGGGCCAGGGA
239	ATCAATTGACACGTCCAAGAGCCAGTTCTCCCTGAGACTGAACTCTGTGACCGCCGCGGACACGGCTGTGTATTACTGTGTGAGAGCTGGTTACGACTCCCCTTCTTTTGCGGACTCTTGGGGCCATGGA
240	TTCCAAGAACACAGTGTATTTACAAATGAACAGCCTGAGTGTCGAAGACACGGCCGTTTATTACTGTTCGAGGGACCCCAAGAAAGGCGTTGTGTATGAATTGAACTACTTCGACCCCTGGGGCCAGGGA
243	CATCTCCAGAGATGATTCTAAAAACACGGTGTCTCTTCAAATGGATACTCTGAAAACGGACGACACAGCCGTCTATTACTGTACCTCAGGGGATATATCTGGGGACATCTATGACTACTGGGGCCAGGGA
247	AGACAATTCCAAGAACACGCTGTATCTGCAAATGAACAGCCTGAGAGCCGAGGACACGGCTGTGTATTACTGTGCGAGAGATTCGTATAGCAGCTCACCTCCCTGTGCTTTTGATATTTGGGGCCAAGGG
249	CACCATCTCCAGAGACAACGTCAACAGTTCACTGTATCTGCAAATGAACAGCCTGAGAGTCGAGGACACGGCTGTCTATTATTGTGCGAGACATCTACGTCCGTACTACTCTGACTATTGGGGCCAGGGA
250	ACTCACCATATCTATAGACACGTCCAAGAATCAATTCTCCCTAAAGTTGACTTCTGTCAGTGTCGCGGACTCGGCTGTCTATTTCTGCACTAGAACTAATAGTGAATCGTTTGACTACTGGGGCCGGGGA
254	GGAACTACGCAGCCTGGGCTTTGACGACTCGACCGTTTATTTCTGCGCGACGGGGGGTCTTGTGGTGCAGGCGATGACAGTTCCGGAAAAATCCTTCTACTCCCACCCTCTGGATGTCTGGGGCCAAGGG
259	CACCTCTGTCAACACGGCTTATTTACAAATCAACAGCCTAAAGACTGACGACACTGCCGTATATTTTTGTGCGAGAGCATATTGTCTCTCTGTCACCTGCCAACCTTTCATGGACTTCTGGGGAAAAGGG
264	CAAGAACTCACTGTATCTGCAAATGAACAGCCTGAGAGCCGAGGACACGGCTGTGTATTACTGTGCGAGAGAAAACGGGAAGCAGCAGCTGGTATTCCCACCCGATGCTTTTGATATCTGGGGCCAAGGG
265	CACCAAAAATTCACTATTTCTCCAAATGAACAGCCTGAGAGACGACGACACGGCTGTCTATTTCTGTGCGAGAGGTGGGCGAGGTGGGCGGTATTCGCGATATGATGCTTTTGACATCTGGGGCCAAGGG
266	CTCCAGAGACAATGCCAAGAATTCACTGTCTCTACAAATGAACAGCCTGACAGCCGAGGACACGGCTCTTTATTACTGTGCGCGAGCCCGGGGATATAATTTTGGTTACTCTGATTACTGGGGCCAGGGC
268	GTCCGTCAGCACAGCCTACATGGAACTGAACAGACTGAGATCTGACGACACGGGCGTGTATTTCTGTGCGAGAGGGGGGCGTATAACAGTGGCTGACCCCCAGGACGATTTTGACTACTGGGGCCAGGGA
269	AGACAATGCCAAGAACTCACTCTATCTCCAAATGAACAGCCTGAGAACCGAAGACACGGCAATCTATTATTGTGCGACAGTCGGGGGCCCTACGGTGATGAGACCTTACTTTGACCTCTGGGGCCAGGGA
272	CATATCAGTAGACACGTCCAAGAACCAGTTCTCCCTAAAGCTGAGCTCTGTGACCGCTGCGGACACGGCCGTATATTACTGTGCGAGAAATTGGGTACAGCTATGGGGCTTTGACTACTGGGGCCAGGGA
273	GACAACGCCAAGAACTCACTGTATCTGCAAATGAACAGCCTGAGAGCCGAGGACACGGCTGTTTATTACTGTGCGAGAGATTTGAGAGGGTCTTACTGTGATAGTAGTGTTTGACTACTGGGGCCAGGGA
274	CAGAGACAACTCGAAGAACACGTTGTATCTGCAAATGAACAGTCTGCGACTTGAGGACACGGCAAGATATTTCTGTGTGAAGGGCCCATATTATTATGATGACAGTGGGTACTACCTCTGGGGCCAGGGA
278	CAGCCTAAAGGCTGAGGACACTGCCGTGTATTACTGTGCGAGAGAGTACCCTTTTGGTTATAGCAGTGGCTGGTATAGGTTTTCAGCTGGTCGTGAATTCTTTTACGGTATGGACGTCTGGGGCCAAGGG
279	CATCTCCAGACACAATTCCAAGAACACGCTGTATCTGCAAATGAACAGCCTGAGAGCCGAGGACACGGCTGTCTATTACTGCGCGAGAGATTCAGAGGGAACTACCACAATTGACTCCTGGGGCCAGGGA
284	GTATATAGAACTCAACAGGCTGACATCTGACGACACGGCCGTATATTACTGTGCGAGATCGACGGGGGCAAGGCGTTTCACGGTTTTTGGAATGCTTACACCTCTCAGTATGGACTTTTGGGGCCAAGGG
285	GTTCCAGGGCAGAGTCATCCTTACCAGGGACACATCCGCGAACACCGCCTACATGGACCTGAGCGGCCTGAAATCTGAAGACACGGCTGTGTATTATTGTGCCAGAGATGAGGACGTCTGGGGCCAAGGG
286	AGTCACGATTTCCGTTGACACGTGCAAAAAGCACTTCTCCCTGACCCTGACCTCTGTGACCGCCGCGGACACGGCTGTCTACTTCTGCACCTTTATGCCTCGGGGATGTATGCTCTCCTGGGGCCAGGGA
289	CATGTCAATAGACACGTCCAAGAATCATTTCTCCCTGAAGCTGAATTCTATGACCGCTGCGGACACGGCCGTGTATTACTGTGCGAGAGCAGTGAATTATTATGATAGGGTTGACTACTGGAGCCAGGGA
293	AAGGCCAGGTCGCGCAGCCTGAAGGCCTCGGACACCGCCATCTATTCCTGTGCGAGACATTTTTGCACGCGGCGCCTATGATTGGAAACCCCTTCCCTACTGCTTTGTGATTGGCGTCTGGGGCCAAGGG
295	GAAGAACACGGTGTATCTTCAACTTACCAATGTGCGAGGCGAGGACACGGCCACATATTTTTGTGCGAGAGGGGACGGAAGTTTTAACTCGGGGCGATATTCGTCCGGACTGGACGTCTGGGGCCAAGGG
301	GGACAAATCGACGTCCACAGTCTACATGGAGCTGAGTGGCCTGAGACCTGAGGACACGGCCGTTTATTATTGTTCGAGAGAGGGGTATTGTTCGAGGCCCAGTTGCTATTATTATTACTGGGGCCAGGGA
303	ATCCACGACCACGGCCGACATGGAGCTGACCAGACTGACATCTAAGGACACGGGCCTCTATTACTGTGCTCTGGTTAGGGGGCCCGTCGGAACTGGAGCTTCTGCCTGGGTCGGCCCCTGGGGCCAGGGA
309	CTCAAGAGATGATTCCAGAAGCATCGCCTATCTGCAAATGAACAGCCTGAAAACCGAGGACACAGCCGTGTATTACTGTACTAAAGGCCATGGTGGGTACAGCAATGGTTGGTACTACTGGGGCCAGGGA
312	AGACAACGCCCAGAACTCCCTTTTTTTGCAAATGAACAACCTGAGAGTCGAAGACACGGCTGTCTATTACTGTACGAGACACGACAAAACCGCGCAGCGTCTCGCTCCTTTATTTGACTGGGGCCAGGGA
318	ATTCACCATCTCCAGAGACAACGCCAAGAACACGTTATATCTGCGAATGAATAGTCTGGGAGTCGAGGACACGGCTGTTTATTATTGTACAAGAGGCATGCGGGATTTGACTGATTTTTGGGGCCAAGGG
321	CACCATCTCCAGAGACAACACCAAGAGTTCACTGTATCTGCAAATGGACAGCCTGAAAGCCGAGGACACGGCCTTTTATTACTGTGCGAGAGAACGCGGGAGCCATTGCTTTGACCAGTGGAGCCAGGGT
322	AGTAGACACGTCCAAGAACCAGTTCTCCCTGAAACTGAACTCTGTGACCGCCGCGGACACGGCTGTGTATTTCTGTGCGAACCTACCTACGGCGACTCAAGATTGGTACTTCGATCTCTGGGGCCGTGGC
323	GAACCAGTTCTCCCTGAACCTGAGGTCTGTGACCGCCGCGGACACGGCTGTGTATTACTGTGCGAGAGCTAGAGGGGGATACAGCTATGGTCCGGTACTTCACTGGTACTTCGATCTCTGGGGCCGTGGC
328	CACGCTGTATCTGCAAATGAATAGCCTGAGAGCTGAGGACACGGCTGTCTATTACTGTGCGAAAGAGGGAGAGAGAGGTATTCAGATTTTTGGAGTAATAAACGGCGGTATGGACGTCTGGGGCCAGGGG
329	CACCAAGGACACGTCCAAAAACCAGGTGGTCCTGAGAATGACCAACCTGGACCCTGTGGACACAGGCACATATTATTGTGCACACTTGACTACACTGACTACCCGCCCTTTTGATGTCTGGGGCCAAGGG
334	CTATCTGGAAATGGACAGCCTCAGAGCCGAGGACACGGCTGTGTATTACTGTGCGAAAGTTAACGGGCCAAGGGATAGAACTTCAACTACGCGATACTATTATCACGGAATGGACGTCTGGGGCCAAGGG
335	CAGAGACAATGTCAAAAATTCATTGTATCTACAACTGGACAACCTGAGAGAGGACGACACGGCCGTCTATTATTGTGCGAGGTGCCTCGTGGTGGTAACCACTGGTTGGTTCGACTCCTGGGGCCAGGGA
337	GAAAGGCAGATTTTGCATCTCTAGAGATGATTCAAGAAGTACTCTTTATCTGCAAATGAAGAGCCTGAAAATTGAGGACACAGCCGTTTATTATTGTTATTCTCCCTGGAACGATTACTGGGGCCAGGGA
339	AGACACGTCCAAGAATCAGTTCTCCCTGAAGTTGAACTCTGTGACCGCCGCGGACACGGCTCTGTATTACTGTGCGAACCGGGCGGGGCAACGACTGGGAAGCAATTGGTTCGACCCCTGGGGCCAGGGA
340	CAGAGACAATTCCAAGAACACACTATATCTTCAGACGAGGACACGGCTGTCTAAAAGTGTAAGAGGGGAGGATAGTAGTGGCTGGAACCGGGGATTATTCTAGTCGGGGTGGGACTGGTGGGGCCAGGAA
341	CACCATCTCCAGAGACAACGCCAAGAACACGCTGTATCTGCAAATGAACAGTCTGAGAGCCGAGGACACGGCTGTCTATTACTGTACAAGGGGTAAATACAGCGATGATCTAGACTACTGGGGCCGGGGA
344	CACGAGCACAGCTTACATGGAGCTGACCAGCCTCAGATCTGACGACACGGCCGTCTATTACTGCGCGAGGGGCAGTTCCGACCGCGACTCCAGTAAGATGTTATTCGATTTTGATTACTGGGGCCAGGGA
346	CATATCAGTAGACAAGTCCAAGAACCAGTTCTCCCTGAGGCTGAGCTCTGTGACCGCCGCGGACACGGCTGTCTATTACTGTGCGAGAGGCGGGGGGGTCTACTACTACATGGACGTCTGGGACAAAGGG
347	CACCATTTCTAGAGACAACGCCAAGCATTCAATGTTTCTGCAATTGAGCAGCCTGACAGTCGACGACATGGCTGTCTATTATTGTGCGAGGACCCGTGGCAGTTTCTCCTTTGACTCCTGGGGCCAGGGA
350	CAAGAATTCACTGTATTTACAAATGAACAGCCTGAGAGCCGAGGACACGGCTGTCTATTACTGTGCGAGAAATTGCACTTCCTCCCCCCCGCCCCCACACTACAACGCTATGGACGTCTGGGGCCAAGGG
351	CTCACTGTATCTGCAAATGAACACCCTGAGAGTCGAAGAGACGGCCGTATATTACTGTGCGAGATTCGGGAAGGAGTCCCAGTTTCCCCCCTATAACGACCACTACGTCCTGGACGTCTGGGGCAAAGGG
353	GACGAATACAACCTTCCTGGAACTGACCAGGCTGACATCTGCCGACACGGCCATTTATTTTTGTGTGAGAAGTCAATCTTCTGAAACCACTCAAAAGTCCATGACCCTTTTTCACTTCTGGGGCCAGGGA
356	CCGATTCTTCATCTCCAGAGACACCGCCAAGAATTCCCTGTTTTTGCAAATGAACAGTCTCAGAGTCGAGGACACGGCTATTTATTACTGTGTGAGGGGCGGGACCCCCTTTGACGACTGGGGCCAGGGA
359	CATCAGCACAGCCTACATGGAGCTGAGCCGGCTGAGATCTGACGACTCGGGCGTTCTTTTCTGTGCGCGAGGGGGGGGAGATCTTGTAGTGGAACCAGTGCCCTACCACATGGACGTCTGGGGCAAAGGG
363	GGGTCGAGTCACCATATCACTGGACACGTCCAAGAATCAGTTCTCCCTGAAGTTGAGGTCTGTGGCCGCCGCAGACACGGCCATATATTACTGTGCGAGAGGGGCGGCAGCAACGCACTGGGGCCAGGGA
364	AAGAGACACTTCCAAGAAGACTGTATATCTGCAAATGAATAGCCTGAGAACTGAGGACACGGCTCTCTATTACTGTGCGAAGGATCTCGGGTGGAAATCTCTGTGGTTGTGTGACTACTGGGGCCAGGGA
365	GTCCAAGAACCAGTTCTCCCTGAATCTGAACTCTCTGACTGCCGCGGACACGGCTGTATATTACTGTGCGAGATTTCCGTGGGGTGGGGATCACTACTACTACTATGGTATGGACGTCTGGGGCCGAGGG
366	ATCCACGCGCACAGCCTACATGGAGCTGAGAAGCCTGACATCTGAGGACACGGCCGTCTATTACTGTGCGAGGCCCTTTGCTGGGTCCACTCCCTCCTTTTATTATTTTATGGACGTCTGGGGCCCAGGG
368	CACCCGCAGGGACAGGAGGATTTTGTGGGGGCTCGTGTCACTGTGAGGATATTGTACTAATGGTGTATGCTATACTTGGTTGTACTTGGGAGGACACTACTACTACGGTATGGACGTCTGGGGCCAAGGG
370	CCTAAATCTGACCTCTGTGACCGCCGCGGACACGGCTGTATATTATTGTGCGAGAGACGCCCCACACGATTTTTTGAGTGATTACATAGTGGGCCACAACTACTATGGAATGGACGTCTGGGGCCAGGGG
372	GAACCAGTTCTCCCTGAAGGTGAGCTCTGTGACCGCCGCGGACACGGCTGTGTATTACTGTGCGAGAGGAGAGTCAGGTGGATTCAGCAATGCCTTCTACTTCTACGGTCTGGACGTCTGGGGCCAAGGG
374	ACTCACTCTTTCACTTGACACGTCCGGGAACCAATTCTCCTTGAGACTGGACTCTGTGACCTCCGCAGACACGGCCGTCTATTTTTGTGCGAGGGGGCCGACCACCTCTTTCGACGTCTGGGGCCAGGGC
375	CTCACTGTTTCTGCAGATGAATAGCCTGAGAGACGAGGACACGGCTACATATTACTGTGTGAGATTTGATAACGGCCGCAGTAGTGGTTATGATTACATTTCTCCCTTCTTTGACTATTGGGGCCAGGGA
376	CTCCAGAGACAACTCCAAGAATATTCTATATCTACATATAAACAGCCTGAGAGCCGAAGACTCGGCCATATATTATTGTGCGAAAGAAAATATGGGGGTCCTGCGGACCTTTGACCACTGGGGCCAGGGA
